# Supplementary material for: Sustaining Practice Change One Year After Completion of the National Depression Management Leadership Initiative
Source: Atypon-hosted journal article supplement (doi:10.1176/appi.ps.201200227), 2013-07-01
Supplement: 703_ds001.pdf [file 703_ds001.pdf]

 


Psychiatry Online
